# Supplementary material for: Combined de novo and genome guided assembly and annotation of the Pinus patula juvenile shoot transcriptome
Source: PubMed Central journal article supplement (PMC4676862; doi:10.1186/s12864-015-2277-7), 2015-12-12
Supplement: 12864_2015_2277_MOESM1_ESM.pdf [file 12864_2015_2277_MOESM1_ESM.pdf]

**Table S1: EvidentialGene tr2aacds pipeline output summary.**

| Category                                                    | Class    | Okay    | Drop    |
|-------------------------------------------------------------|----------|---------|---------|
| Primary transcripts with alternatives                       |          | 41 474  | 1 849   |
|                                                             | a2       | 5 085   | 481     |
| Primary transcripts without alternatives                    |          | 19 451  | 2 302   |
|                                                             | a2       | 367     | 24      |
| Alternative transcripts with primary transcripts identified | mid      | 23 837  | 1 436   |
|                                                             | mid a2   | 2 069   | 93      |
|                                                             | hi       | 58 913  | 27 488  |
|                                                             | hi1      | 79 273  | 145 823 |
|                                                             | hi a2    | 0       | 4 603   |
|                                                             | mfrag    | 15 233  | 1 774   |
|                                                             | mfrag a2 | 1 333   | 124     |
|                                                             | hi       | 0       | 97 926  |
| Partial alternative transcripts                             | hi1      | 0       | 63 473  |
|                                                             | hi a2    | 0       | 9 621   |
|                                                             |          |         |         |
| Total                                                       |          | 247 035 | 357 017 |

a2 = high protein identity.

hi = > 98% sequence identity to primary transcript.

hi1 = very high identity to primary transcript.

mid = lower sequence identity to primary.

mfrag = shorter sequence with lower identity to primary, potential paralog.
