# Supplementary material for: Combined de novo and genome guided assembly and annotation of the Pinus patula juvenile shoot transcriptome
Source: PubMed Central journal article supplement (PMC4676862; doi:10.1186/s12864-015-2277-7), 2015-12-12
Supplement: 12864_2015_2277_MOESM2_ESM.pdf [file 12864_2015_2277_MOESM2_ESM.pdf]

**Table S2: Assembly statistics for EvidentialGene tr2aacds pipeline merged assembly compared to average statistics for each assembler.**

| Assembly                    | Merged Assembly |             | Trinity | Velvet/Oases | SOAPdenovo-Trans |
|-----------------------------|-----------------|-------------|---------|--------------|------------------|
|                             | Loci            | Transcripts |         |              |                  |
| Total Assembled Transcripts | 66 377          | 247 035     | 134 766 | 185 574      | 271 378          |
| Longest Transcript (Kb)     | 10 839          | 10 839      | 12 167  | 11 490       | 27 448           |
| Assembly Length (Mb)        | 63.45           | 230.62      | 123.11  | 216.75       | 121.16           |
| Mean Sequence Length (nt)   | 956             | 934         | 910     | 1 195        | 392              |
| Predicted ORFs in assembly  | 38 386          | 134 827     | 41 425  | 86 984       | 33 707           |
| % ORF <sup>1</sup>          | 85.46%          | 78.97%      | 52.70%  | 55.73%       | 12.42%           |
| N90                         | 462             | 480         | 449     | 589          | 356              |
| N70                         | 798             | 786         | 728     | 1 049        | 983              |
| N50                         | 1 194           | 1 113       | 1 122   | 1 530        | 1 802            |
| N30                         | 1 692           | 1 539       | 1 697   | 2 158        | 2 979            |
| N10                         | 2 853           | 2 514       | 2 745   | 3 441        | 27 448           |
| GC                          | 46.87%          | 46.00%      | 42.55%  | 42.98%       | 42.91%           |
| CPG ratio <sup>2</sup>      | 1.71            | 1.69        | 1.65    | 1.65         | 1.69             |
| % N <sup>3</sup>            | 0.13%           | 0.13%       | 0.00%   | 0.05%        | 1.08%            |

<sup>1</sup> mean percentage of a contig covered by an open reading frame (ORF).

<sup>2</sup> counts of CpG sites relative to the expected number.

<sup>3</sup> proportion of bases in the assembly that are N.
